# Supplementary material for: Effect of coherent breathing on mental health and wellbeing: a randomised placebo-controlled trial
Source: PubMed Central journal article supplement (PMC10719279; doi:10.1038/s41598-023-49279-8), 2023-12-13
Supplement: 41598_2023_49279_MOESM1_ESM.pdf [file 41598_2023_49279_MOESM1_ESM.pdf]

## Supplementary material

### Effect of coherent breathing on mental health and wellbeing: A randomised placebo-controlled trial

Mr Guy William Fincham<sup>1,2\*</sup>, MSc, Prof Clara Strauss<sup>1,3</sup>, DClInPsy, PhD, Prof Kate Cavanagh<sup>1,3</sup>, DClInPsy, PhD

<sup>1</sup> Department of Psychology, University of Sussex, Brighton, UK

<sup>2</sup> Brighton & Sussex Medical School, University of Sussex, UK

<sup>3</sup> Research & Development Department, Sussex Partnership NHS Foundation Trust, UK

\*Corresponding author

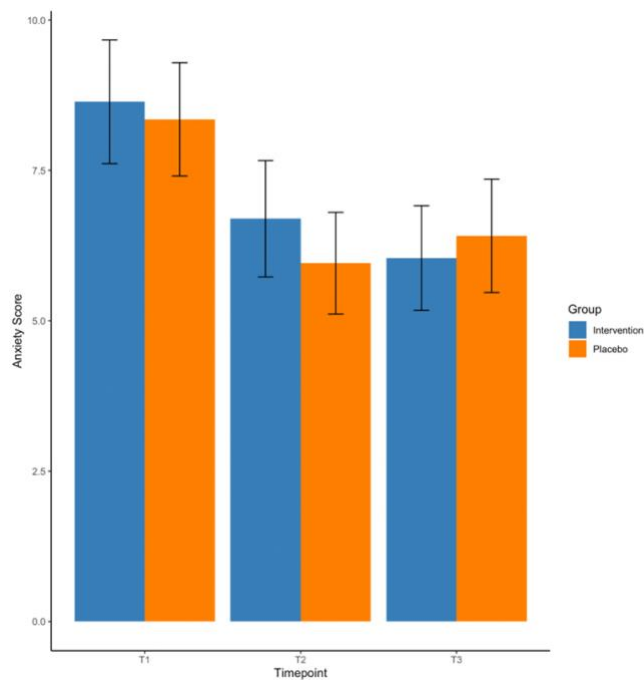

Figure 3. Mean ( $\pm$  95% CI) DASS anxiety scores for the intervention and placebo groups at pre-post-follow-up (T1, T2, and T3). Blue bars are coherent breathing intervention group scores and orange bars are placebo breathwork group scores at each timepoint. Lower scores denote reduced anxiety levels, with a possible score range of 0-42. Figure produced using R v4.1.2.

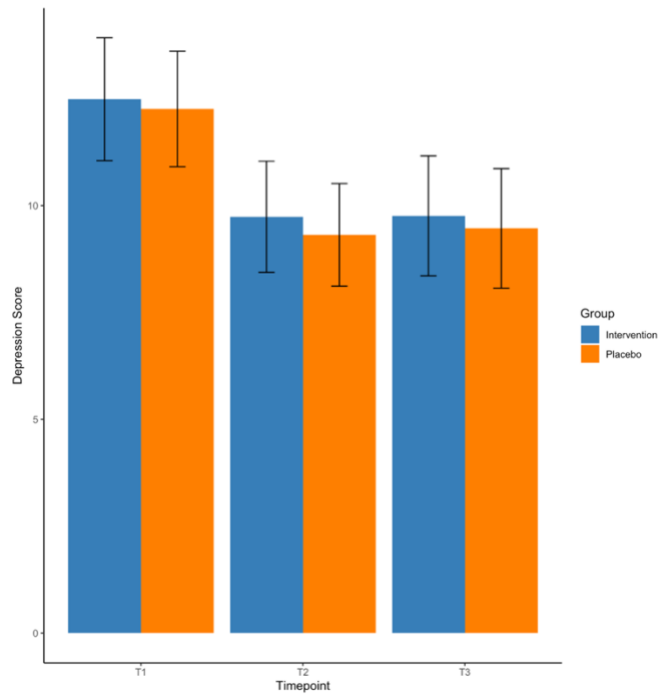

Figure 4. Mean ( $\pm$  95% CI) DASS depression scores for the intervention and placebo groups at pre-post-follow-up (T1, T2, and T3). Blue bars are coherent breathing intervention group scores and orange bars are placebo breathwork group scores at each timepoint. Lower scores denote less depressive symptoms, with a possible score range of 0-42. Figure produced using R v4.1.2.

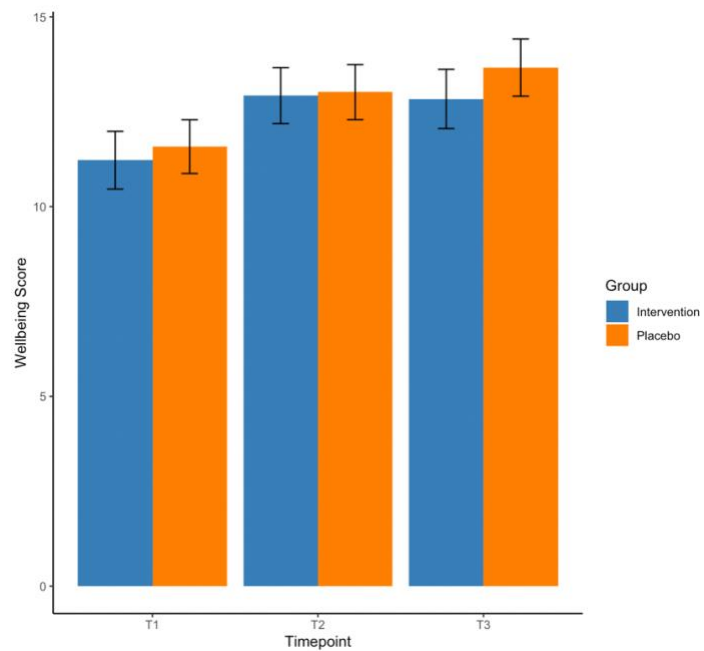

Figure 5. Mean ( $\pm$  95% CI) WHO-5 wellbeing scores for the intervention and placebo groups at pre-post-follow-up (T1, T2, and T3). Blue bars are coherent breathing intervention group scores and orange bars are placebo breathwork group scores at each timepoint. Higher scores denote greater levels of wellbeing, with a possible score range of 0-25. Figure produced using R v4.1.2.

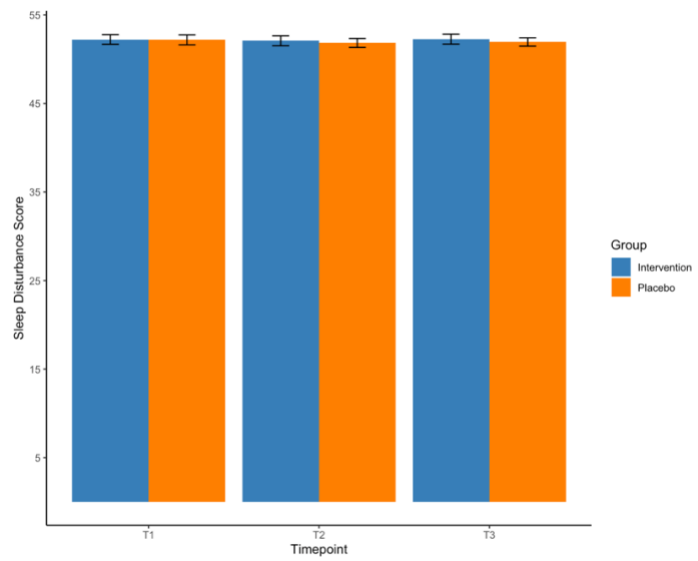

Figure 6. Mean ( $\pm$  95% CI) PROMIS-8a sleep disturbance scores for the intervention and placebo groups at pre-post-follow-up (T1, T2, and T3). Blue bars are coherent breathing intervention group scores and orange bars are placebo breathwork group scores at each timepoint. Lower scores denote less sleep disturbance, with a possible score range of 30.5-77.5. Figure produced using R v4.1.2.
